# Supplementary material
Source: Springer Nature journal article supplement (https://www.springermedizin.de/resource/supplementary/12985_2010_978_MOESM5_ESM.pdf/9608870)

HA

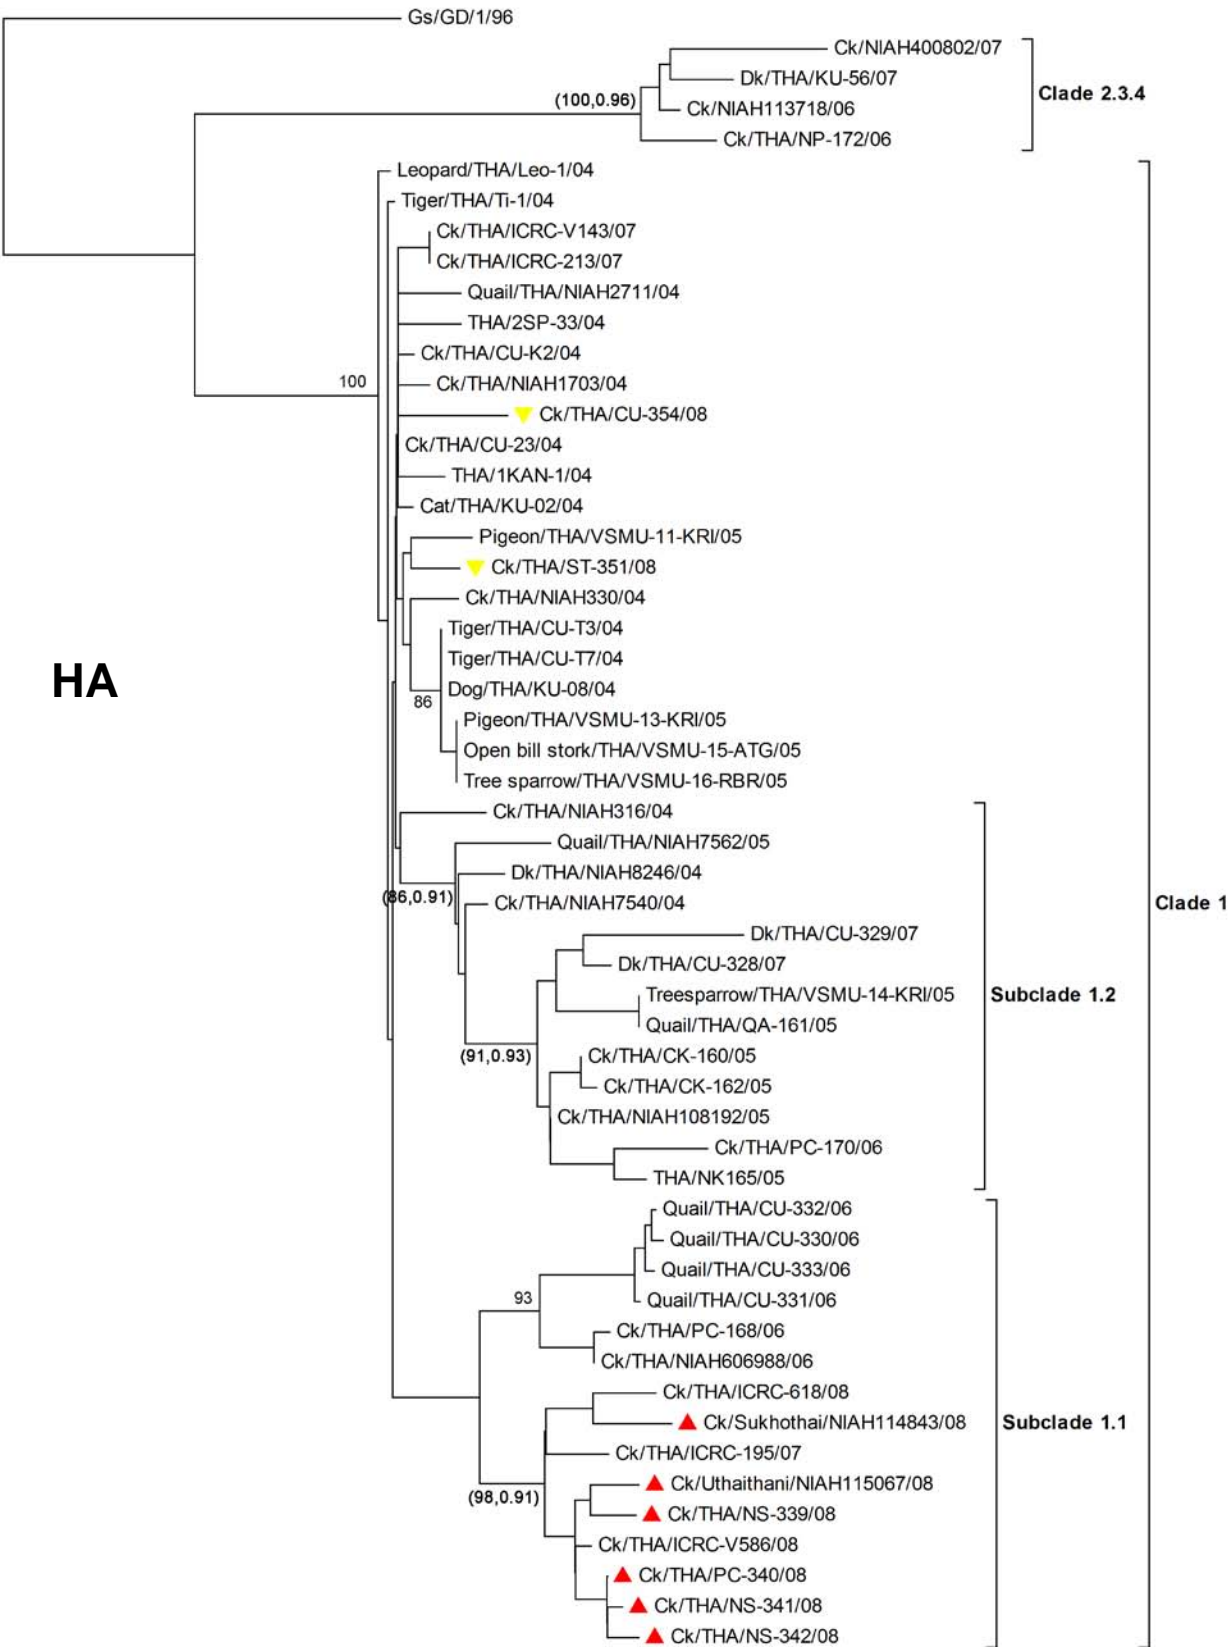

Supplement: MOESM5 [file 9608870]
